# Supplementary material for: The airglow layer emission altitude cannot be determined unambiguously from temperature comparison with lidars
Source: Copernicus journal article supplement (doi:10.5194/acp-18-6691-2018), 2018-05-14
Supplement: Supplementary file 2 [file acp-18-6691-2018-supplement.zip]

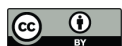

## *Supplement of*

# **The airglow layer emission altitude cannot be determined unambiguously from temperature comparison with lidars**

**Tim Dunker**

*Correspondence to:* Tim Dunker (tdu@justervesenet.no)

- [acp-18-6691-2018-supplement-title-page.pdf](#)
- [lidar\\_measurements.csv](#)
- [supplement.pdf](#)

The copyright of individual parts of the supplement might differ from the CC BY 3.0 License.
